# Supplementary material for: Ultrathin core–shell–satellite structured Au@PtPd@Pt nanowires for superior electrocatalytic hydrogen evolution
Source: Royal Society of Chemistry journal article supplement (doi:10.1039/d3qm00618b), 2023-11-01
Supplement: d3qm00618b1.pdf [file d3qm00618b1.pdf]

## Supporting information

Ultrathin core-shell-satellite structured Au@PtPd@Pt nanowires for superior electrocatalytic hydrogen evolution†

*Caikang Wang,<sup>‡ac</sup> Xian Jiang<sup>‡\*a</sup>, Qicheng Liu,<sup>d</sup> Jiaqian Ding,<sup>d</sup> Juan Zhou,<sup>\*c</sup> Yawen Tang,<sup>d</sup> Gengtao Fu<sup>d</sup> and Jong-Min Lee<sup>\*b</sup>*

<sup>a</sup> School of New Energy, Nanjing University of Science and Technology, Jiangyin, 214443, China.

<sup>b</sup> School of Chemical and Biomedical Engineering, Nanyang Technology University, Singapore 637459, Singapore.

<sup>c</sup> School of Energy and Power Engineering, Nanjing University of Science and Technology, 200 Xiaolingwei Street, Jiangsu Province, 210094, China.

<sup>d</sup> Jiangsu Key Laboratory of New Power Batteries, Jiangsu Collaborative Innovation Centre of Biomedical Functional Materials, School of Chemistry and Materials Science, Nanjing Normal University, Nanjing 210023, China.

### Corresponding Author

E-mail address: xianjiang@njust.edu.cn (X. Jiang); gengtaofu@gmail.com (G. Fu); jmlee@ntu.edu.sg (J.-M. Lee)

† These authors contributed equally to the paper.

## Part I: Experimental

**Chemicals and Reagents:** 1-naphthol ( $C_{10}H_8O$ ) was purchased from Aladdin (Shanghai, China). Hydrogen tetrachlorocuprate tetrahydrate ( $HAuCl_4 \cdot 4H_2O$ ) and palladium chloride ( $PdCl_2$ ) was supplied by Shanghai D&B Biological Science and Technology Co., Ltd. Chloroplatinic acid ( $H_2PtCl_6$ ), polyvinylpyrrolidone (PVP), L-ascorbic acid (AA), sodium hydroxide (KOH) and ethanol ( $C_2H_5OH$ ) were purchased from Sinopharm Chemical Reagent Co. Ltd (Shanghai, China). Nafion (5 wt.%) was purchased from Sigma-Aldrich Chemical Reagent Co., Ltd. Commercial 20% Pt/C was acquired from Johnson Matthey Corporation. Deionized water (DI water,  $18.2 M\Omega cm^{-1}$ ) was employed throughout all experiments. All chemicals were of analytical reagent grade and used without further purification.

**Preparation of Au nanowires (NWs):** The ultrathin Au NWs were prepared according to our previous work.<sup>1</sup> In a typical synthesis, 3.0 mL of 0.5 M 1-naphthol ethanol solution was added into 3.0 mL of 0.05 M  $HAuCl_4$  aqueous solution at 60 °C under water bath conditions. After aging for a few minutes (~ 2 min), the resultant product was collected by centrifugation of 9000 rpm for 3 min, washed with ethanol several times, and re-dispersed in ethanol.

**Preparation of Au@PtPd@Pt NWs:** For the synthesis of Au@PtPd@Pt NWs, the well-dispersed Au NWs (6.0 mg) and 30 mg PVP were added into the mixed solution of 7.5 mL  $H_2O$  and 7.5 mL  $C_2H_5OH$  in a 30 mL vial. After uniform dispersion by sonication, 0.20 mL 0.05 M  $PdCl_2$  and 0.20 mL 0.05 M  $H_2PtCl_6$  aqueous solution were dissolved in the vial under vigorous stirring. Subsequently, 1.0 mL 0.10 M AA aqueous solution was immediately added to the resulting solution, and the vial was then immersed in a water bath held at 60 °C for 2h under magnetic stirring. After the reaction system cooled down to room temperature, the produced Au@PtPd@Pt NWs were finally collected by centrifugation 10000 rpm for 10 min and washed with ethanol six times.

**Preparation of Au@Pt NWs and Au@Pd NWs:** The synthesis of Au@Pt and Au@Pd NWs were similar to that of Au@PtPd@Pt NWs, except for substituting 0.20 mL 0.05 M H<sub>2</sub>PtCl<sub>6</sub> + 0.20 mL 0.05 M PdCl<sub>2</sub> aqueous solution for 0.40 mL 0.05 M H<sub>2</sub>PtCl<sub>6</sub> aqueous solution or 0.40 mL 0.05 M PdCl<sub>2</sub> aqueous solution, respectively.

**Characterizations:** Transmission electron microscopy (TEM), high-resolution TEM (HRTEM), high-angle annular dark-field scanning transmission electron microscopy (HAADF-STEM), and energy dispersive X-ray (EDX) elemental mapping measurements were made on a JEOL JEM-2100F transmission electron microscopy operated at an accelerating voltage of 200 kV. The crystallinity of the samples was determined by recording X-ray diffraction (XRD) patterns on a Model D/max-rC X-ray diffractometer using Cu K $\alpha$  radiation source ( $\lambda = 1.5406 \text{ \AA}$ ) and operating at 40 kV and 100 mA. X-ray photoelectron spectroscopy (XPS) measurements were performed with a Thermo VG Scientific ESCALAB 250 spectrometer with a monochromatic Al K $\alpha$  X-ray source. The binding energy was calibrated by means of the C1s peak energy of 284.6 eV.

**Electrochemical measurements:** All electrochemical measurements were performed in a standard three-electrode electrochemical cell at ambient temperature using a CHI 760E workstation (CH Instruments, Shanghai, Chenhua Co., Ltd.). A graphite rod serves as auxiliary electrode and a saturated calomel electrode (SCE) works as reference electrode. For the preparation of catalyst inks, 2.0 mg prepared NWs or commercial Pt black and 2.0 mg Vulcan XC-72 carbon were well dispersed in 1.0 mL mixed solvent consisting of 0.60 mL ethanol and 0.30 mL H<sub>2</sub>O, and 0.10 mL Nafion solution (5 wt.%) with the following sufficient sonication. Then, the glassy carbon electrode (d=3 mm) loaded with 10  $\mu$ L of the mixed catalyst ink was used as the working electrode. Electrochemical HER was investigated in N<sub>2</sub>-saturated 1M KOH solution with a sweeping rate of 5 mV s<sup>-1</sup>. HER polarization curves were obtained using LSV with 95% *iR* compensation (*iR*, automatically measured with the CHI 760E electrochemical workstation). All electrode potentials were quoted versus reversible hydrogen electrodes (RHE). We conducted the RHE calibration with

reference to a method in the literature, while in our electrochemical test system of 1.0 M KOH,  $E(\text{RHE}) = E(\text{SCE}) + 1.071 \text{ V}$ .<sup>2</sup> Turnover frequency (TOF) was calculated with using following equation:  $TOF = jA/nFN$ , where  $j$  is the current density under overpotential  $\eta = 50 \text{ mV}$ ,  $A$  is the geometric area of the working electrode,  $n$  is the electron transferred number in the HER reaction ion (*i.e.* 2),  $F$  is the Faraday constant of  $96485.3 \text{ C mol}^{-1}$ , and  $N$  is the number of active sites (mol) calculated with the total mass loading. Electrochemical double-layer capacitance ( $C_{dl}$ ) was calculated from the CV curves tested in a non-Faradic region under different scan rates from 40 to 160  $\text{mV s}^{-1}$ . The ECSA of the catalyst was estimated to be  $C_{dl}/C_s$ , where  $C_s$  represents the specific capacitance of catalyst ( $0.06 \text{ mF cm}^{-2}$ ). To calculate  $j_{\text{ECSA}}$  of the catalysts, we normalized the measured current by the ECSA from the equation:  $j_{\text{ECSA}} = i/\text{ECSA}$ , where  $i$  is the measured current (mA), and ECSA is the ECSA value ( $\text{cm}^2$ ). Electrochemical impedance spectroscopy (EIS) was tested over a frequency range of 100 kHz-0.1 Hz. The accelerated durability test (ADT) of CVs is performed between the potential range from -0.05 V to 0.05 V vs. RHE for 10,000 cycles with a scan rate of  $100 \text{ mV s}^{-1}$ . The long-term durability was recorded by chronopotentiometry measurement at 10 mA  $\text{cm}^{-2}$  for 27 h.

## Part II: Figures and Tables

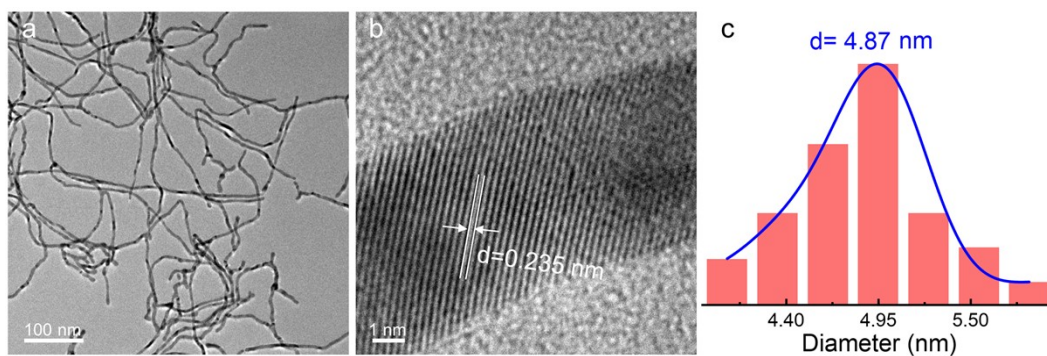

**Fig. S1** (a) TEM image, (b) HRTEM image, and (c) particle-size distribution histogram of Au NWs.

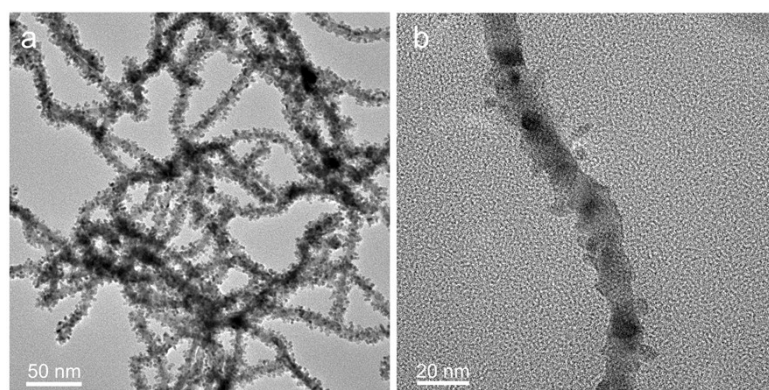

**Fig. S2** TEM images of Au@PtPd@Pt NWs.

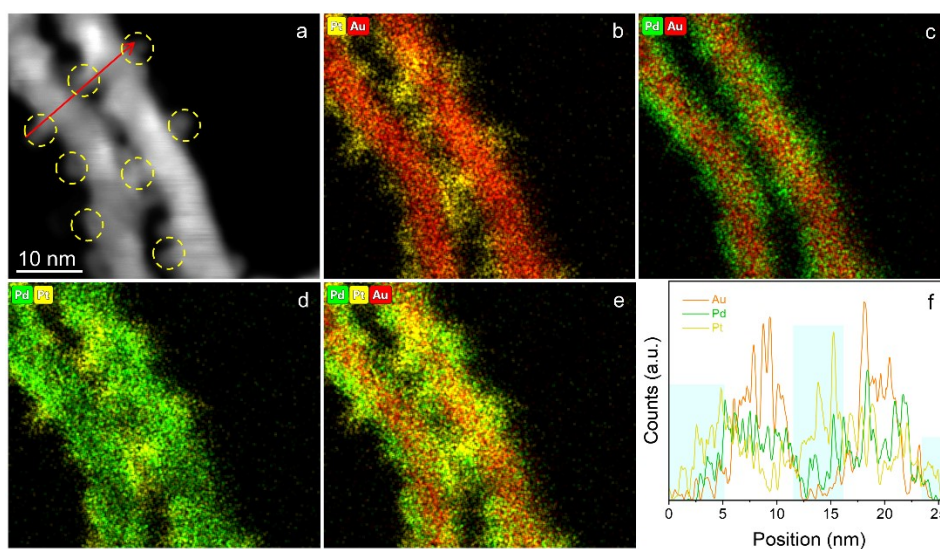

**Fig. S3** Detailed characterizations of the core-shell-satellite structure in Au@PtPd@Pt NWs: (a-e) STEM image and the corresponding EDX elemental mapping images. (f) EDX line-scan profile.

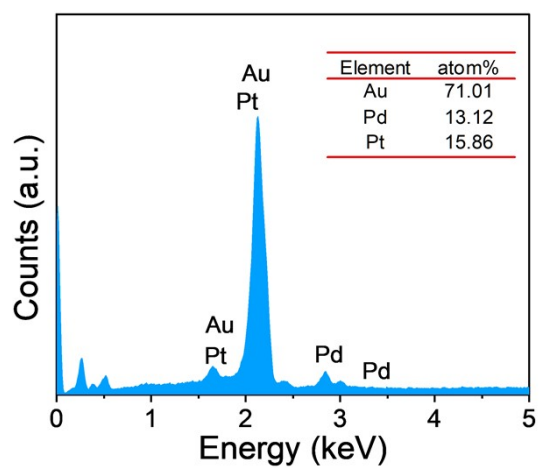

**Fig. S4** EDX spectrum of Au@PtPd@Pt NWs.

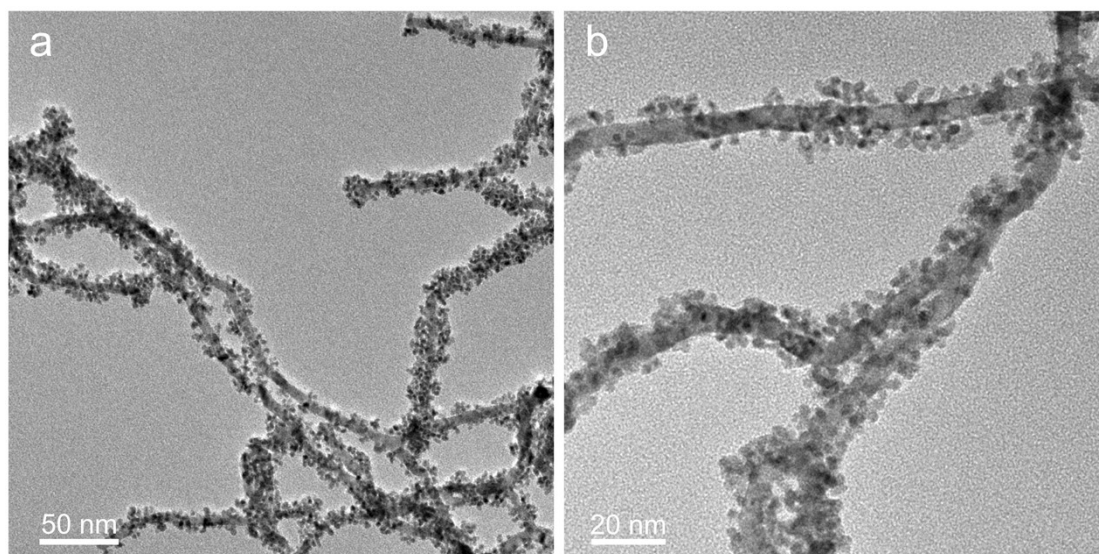

**Fig. S5** TEM images of Au@Pt NWs.

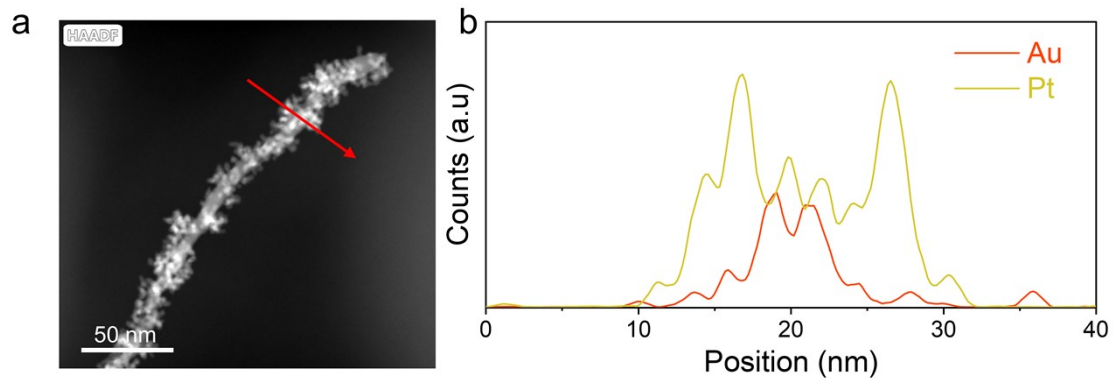

**Fig. S6** STEM image and the corresponding EDX line-scan profile of Au@Pt NWs.

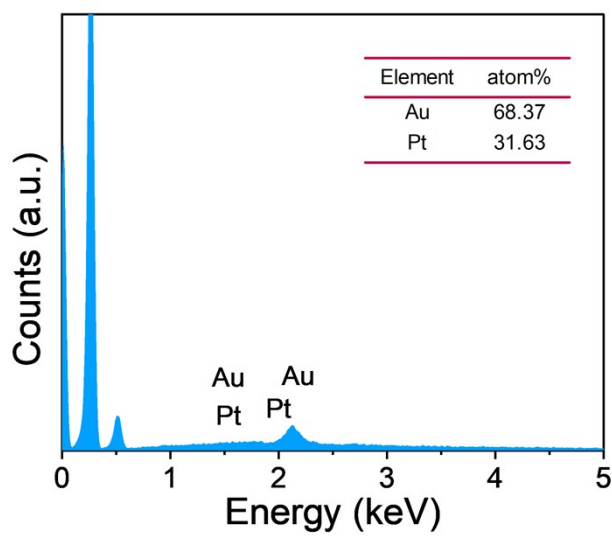

**Fig. S7** EDX spectrum of Au@Pt NWs.



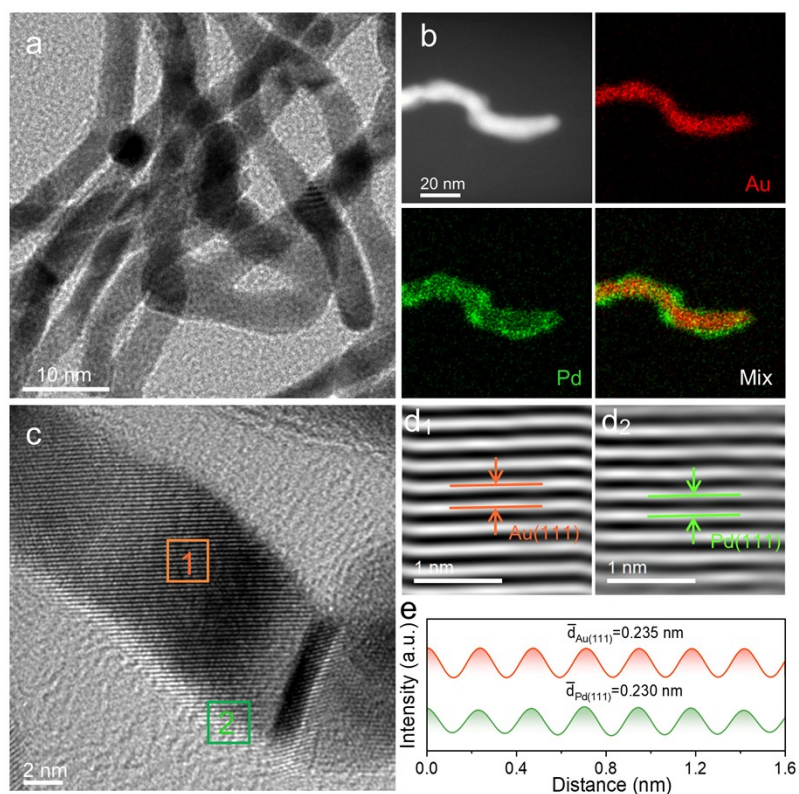

**Fig. S8** Structural characterizations of Au@Pd NWs. (a) TEM image. (b) STEM image and the corresponding EDX elemental mapping images. (c) HRTEM image. (d) Fourier-filtered lattice fringe images taken from the rectangular regions in c, and (e) corresponding integrated pixel intensities.

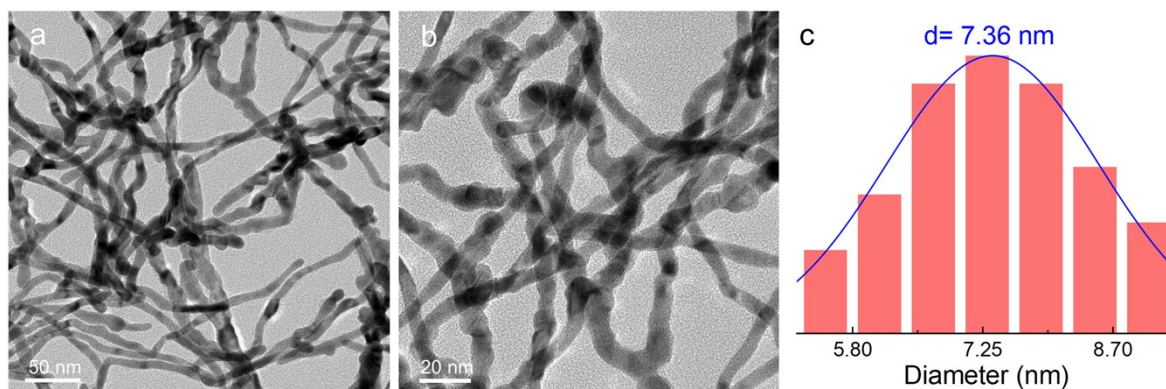

**Fig. S9** (a-b) TEM images, (c) particle-size distribution histogram of Au@Pd NWs.



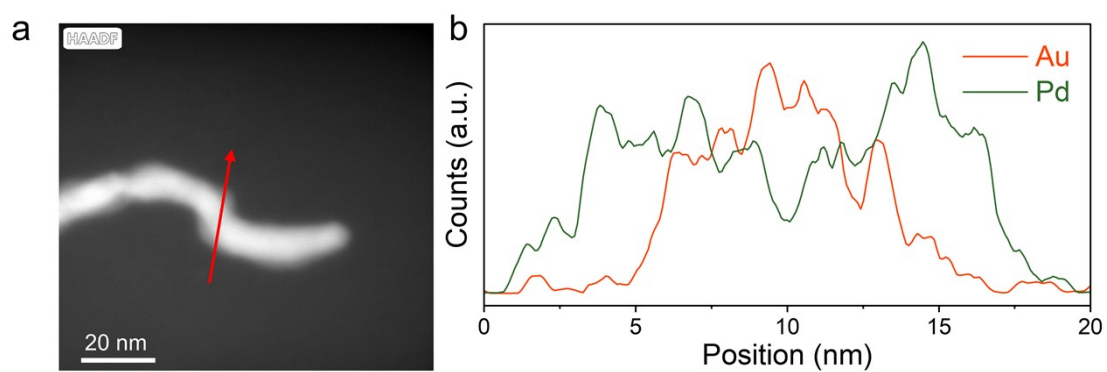

**Fig. S10** EDX line-scan profile of Au@Pd NWs.

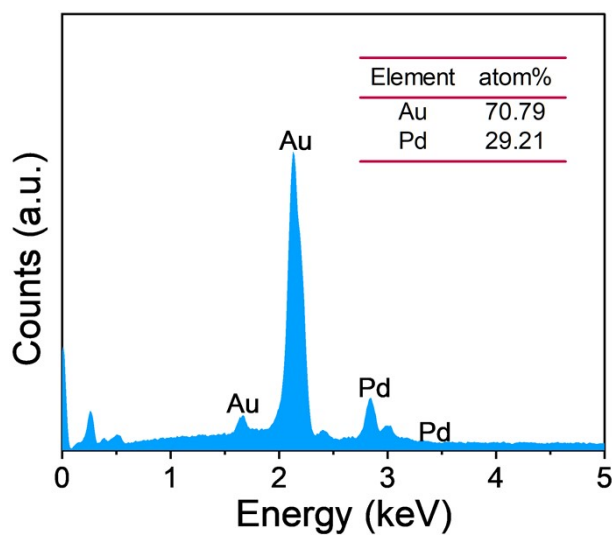

**Fig. S11** EDX spectrum of Au@Pd NWs.

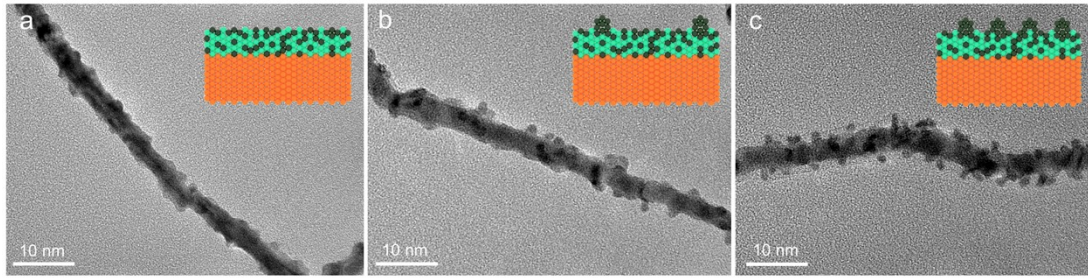

**Fig. S12** TEM images of samples at different stages of the synthetic process of wire-like core-satellite Au@PtPd@Pt NWs: (a) 40, (b) 80, (c) 120 min.

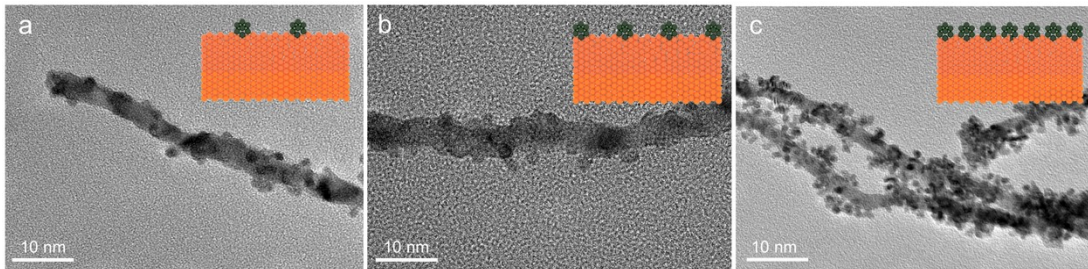

**Fig. S13** TEM images of samples at different stages of the synthetic process of wire-like core-satellite Au@Pt NWs: (a) 40, (b) 80, (c) 120 min.

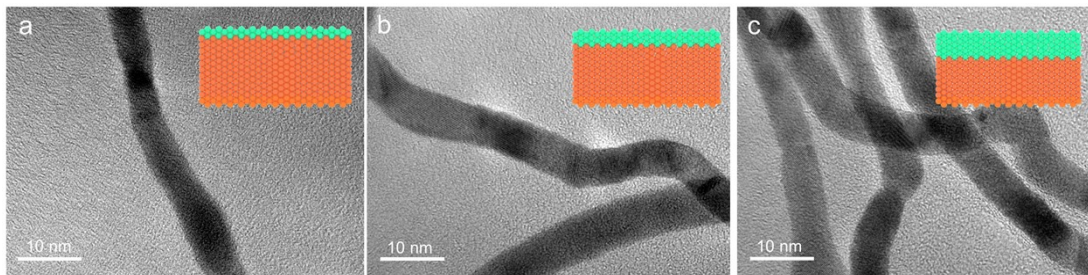

**Fig. S14** TEM images of samples at different stages of the synthetic process of wire-like core-satellite Au@Pd NWs: (a) 40, (b) 80, (c) 120 min.

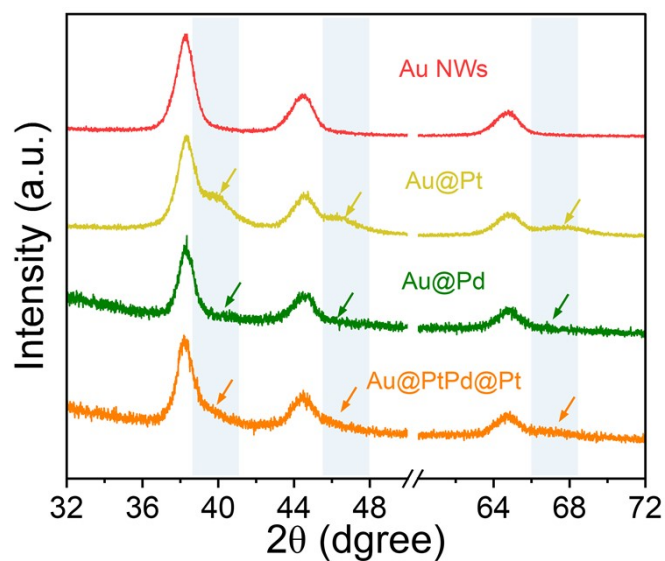

**Fig. S15** Enlarged XRD patterns of Au, Au@Pd, Au@Pt and Au@PtPd@Pt NWs.

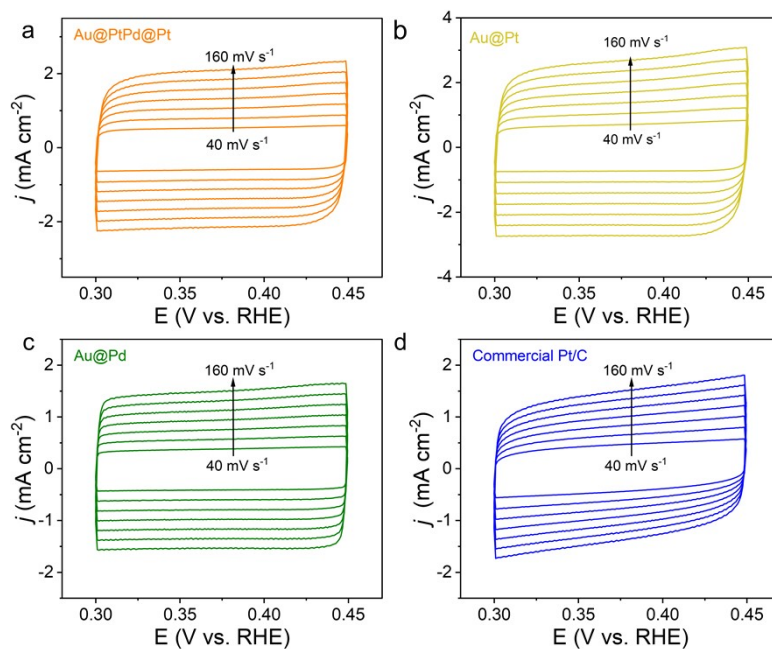

**Fig. S16** CV plots of (a) Au@PtPd@Pt NWs, (b) Au@Pt NWs, (c) Au@Pd NWs, and (d) commercial Pt/C with varying scan rates from 40 to 160  $\text{mV s}^{-1}$  in 1.0 M KOH.

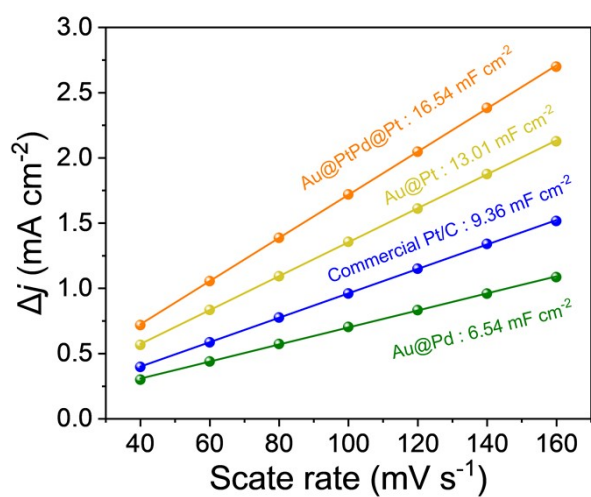

**Fig. S17** The calculated  $C_{dl}$  values of the electrocatalysts.

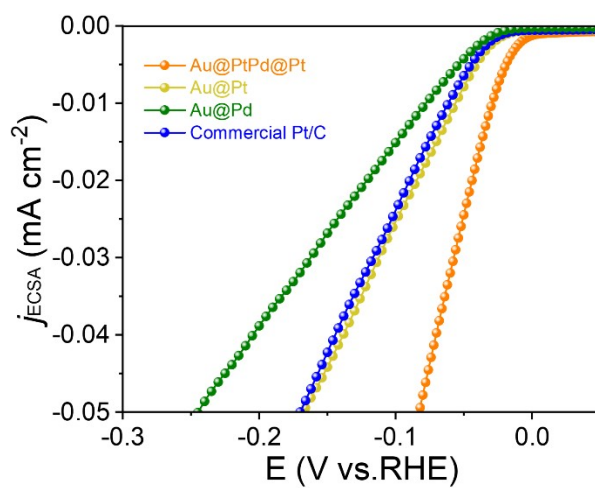

**Fig. S18** The ECSA-normalized HER polarization curves of the catalysts in  $N_2$ -saturated 1.0 M KOH.

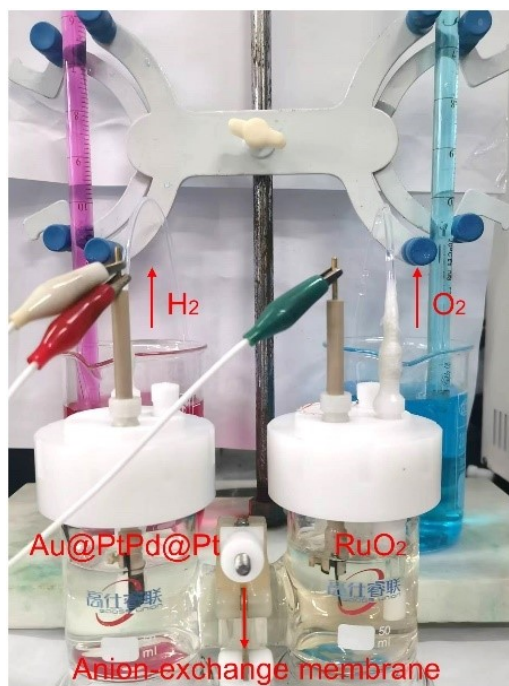

**Fig. S19** Digital photograph of the water-splitting electrolyzer and corresponding gas-collecting device.

**Table S1.** The element content of the prepared catalysts obtained using ICP-OES and EDX.

| Sample     | ICP-OES               | EDX                   |
|------------|-----------------------|-----------------------|
|            | Pt : Pd : Au (%)      | Pt : Pd : Au (%)      |
| Au@PtPd@Pt | 15.24 : 12.83 : 71.93 | 15.86 : 13.12 : 71.01 |
| Au@Pt      | 29.98 : 0 : 70.02     | 31.63 : 0 : 68.37     |
| Au@Pd      | 0 : 30.12 : 69.88     | 0 : 29.21 : 70.79     |

**Table S2.** Comparison of the HER activity with other reported noble and non-noble metal-based electrocatalysts in 1.0 M KOH.

| Catalysts                                           | $\eta_{10}$<br>(mV) | Tafel Slope<br>(mV dec <sup>-1</sup> ) | Mass activity<br>(A mg <sup>-1</sup> @mV)     | References                                         |
|-----------------------------------------------------|---------------------|----------------------------------------|-----------------------------------------------|----------------------------------------------------|
| <b>Au@PtPd@Pt</b>                                   | <b>23</b>           | <b>32</b>                              | <b>1.88 A mg<sup>-1</sup>@50 mV</b>           | <b>This work</b>                                   |
| Pt/Ni PCNFs                                         | 46                  | 43.8                                   | -                                             | Chin. Chem. Lett. <b>2023</b> , 34, 107359         |
| Pt/CuO NPC                                          | 39                  | 41.7                                   | -                                             | Chem. Eng. J. <b>2023</b> , 455, 140856            |
| PdPt bimetalloenes                                  | 27.1                | 67.6                                   | -                                             | Carbon Energy <b>2023</b> , e367                   |
| Pt/TeO <sub>x</sub>                                 | 33                  | 29                                     | -                                             | Int. J. Hydrogen Energy <b>2023</b> , 48, 16593    |
| Pt/Ti <sub>3</sub> C <sub>2</sub> (OH) <sub>x</sub> | 58                  | 30                                     | -                                             | J. Mater. Chem. A <b>2023</b> , 11, 5328           |
| Pd-CeO <sub>2</sub> -x-NC                           | 115                 | 58                                     | 0.87 A mg <sub>Pt</sub> <sup>-1</sup> @50 mV  | J. Colloid Interface Sci. <b>2022</b> , 611, 554   |
| Pt@CoS                                              | 28                  | 31                                     | -                                             | Appl. Catal. B: Environ. <b>2022</b> , 315, 121534 |
| Pt/Pt <sub>5</sub> P <sub>2</sub> nanocage          | 29                  | 29.1                                   | 0.80 A mg <sub>Pt</sub> <sup>-1</sup> @100 mV | Adv. Funct. Mater. <b>2022</b> , 32, 2205985       |
| Pt/NiO flowers                                      | 66                  | 82                                     | 0.91 A mg <sub>Pt</sub> <sup>-1</sup> @66 mV  | Int. J. Hydrogen Energy. <b>2022</b> , 47, 33988   |
| Ru-Te nanorods                                      | 37                  | 61.6                                   | -                                             | Nanoscale <b>2022</b> , 14, 14913                  |
| Pd <sub>1</sub> -CoSe <sub>2</sub> NBs              | 42                  | 78                                     | -                                             | Appl. Catal. B: Environ. <b>2021</b> , 295, 120280 |
| Pd-e-NiCo-PBA-C                                     | 147                 | 67                                     | -                                             | Adv. Funct. Mater. <b>2021</b> , 31, 2008989.      |
| NiPd alloy                                          | 38                  | 168                                    | -                                             | Chem. Eng. J. <b>2021</b> , 411, 128486            |
| PtSe <sub>2</sub> /Pt                               | 42                  | 53                                     | -                                             | Angew. Chem. Int. Ed. <b>2021</b> , 60, 23388      |
| PtSe <sub>2</sub> nanosheet                         | 138                 | 100                                    | -                                             | Adv. Funct. Mater. <b>2021</b> , 31, 2102321       |
| Pt/Ni(OH) <sub>2</sub> /NF                          | 25.9                | 37.6                                   | 0.81 A mg <sub>Pt</sub> <sup>-1</sup> @50 mV  | Int. J. Hydrogen Energy <b>2020</b> , 45, 27067    |
| Pt/NiO/Ni/CNT                                       | 217                 | 90.1                                   | 0.30 A mg <sub>Pt</sub> <sup>-1</sup> @50 mV  | Nanoscale <b>2020</b> , 12, 14615                  |
| FeCoNiRu-450                                        | 40                  | 84                                     | 1.31 A mg <sup>-1</sup> @100 mV               | Adv. Sci. <b>2023</b> , 10, 2300094                |
| NiO@1T-MoS <sub>2</sub>                             | 46                  | 52                                     | -                                             | Nat. Commun. <b>2019</b> , 10, 982                 |
| Co <sub>3</sub> S <sub>4</sub> PNS <sub>vac</sub>   | 63                  | 58                                     | 1.06 A mg <sup>-1</sup> @200 mV               | ACS Catal. <b>2018</b> , 8, 8077-8083              |
| NiO/PtNi                                            | 40                  | 79                                     | -                                             | J. Am. Chem. Soc. <b>2018</b> , 140, 8982          |
| Ni <sub>3</sub> S <sub>2</sub> /NF                  | 240                 | 152                                    | -                                             | Adv. Energy Mater. <b>2018</b> , 8, 1703538        |
| NiCoN/C                                             | 103                 | --                                     | 2.04 A mg <sup>-1</sup> @200 mV               | Adv. Mater. <b>2019</b> , 31, 1805541              |
| Ni-Mo-N                                             | 40                  | 70                                     | -                                             | Nat. Commun. <b>2019</b> , 10, 5335                |
| Ni-BDT-A                                            | 80                  | 70                                     | -                                             | Chem <b>2017</b> , 3, 122                          |
| CoP UPNSs                                           | 56                  | 44                                     | 0.15 A mg <sup>-1</sup> @100 mV               | Chem. Sci., <b>2017</b> , 8, 2769-2775             |
| CuNi NC                                             | 140                 | 79                                     | -                                             | ACS Catal. <b>2019</b> , 9, 5084                   |



## References

- 1 X. Jiang, X. Qiu, G. Fu, J. Sun, Z. Huang, D. Sun, L. Xu, J. Zhou and Y. Tang, Highly simple and rapid synthesis of ultrathin gold nanowires with (111)-dominant facets and enhanced electrocatalytic properties, *J. Mater. Chem. A*, 2018, **6**, 17682-17687.
- 2 Y. Y. Liang, Y. G. Li, H. L. Wang, J. G. Zhou, J. Wang, T. Regier and H. J. Dai, Co<sub>3</sub>O<sub>4</sub> nanocrystals on graphene as a synergistic catalyst for oxygen reduction reaction, *Nat. Mater.*, 2011, **10**, 780-786.
